# Supplementary material for: The Collaborative Cross as a Resource for Modeling Human Disease: CC011/Unc, a New Mouse Model for Spontaneous Colitis
Source: PubMed Central journal article supplement (PMC3960486; doi:10.1007/s00335-013-9499-2), 2014-02-01

# colitis score

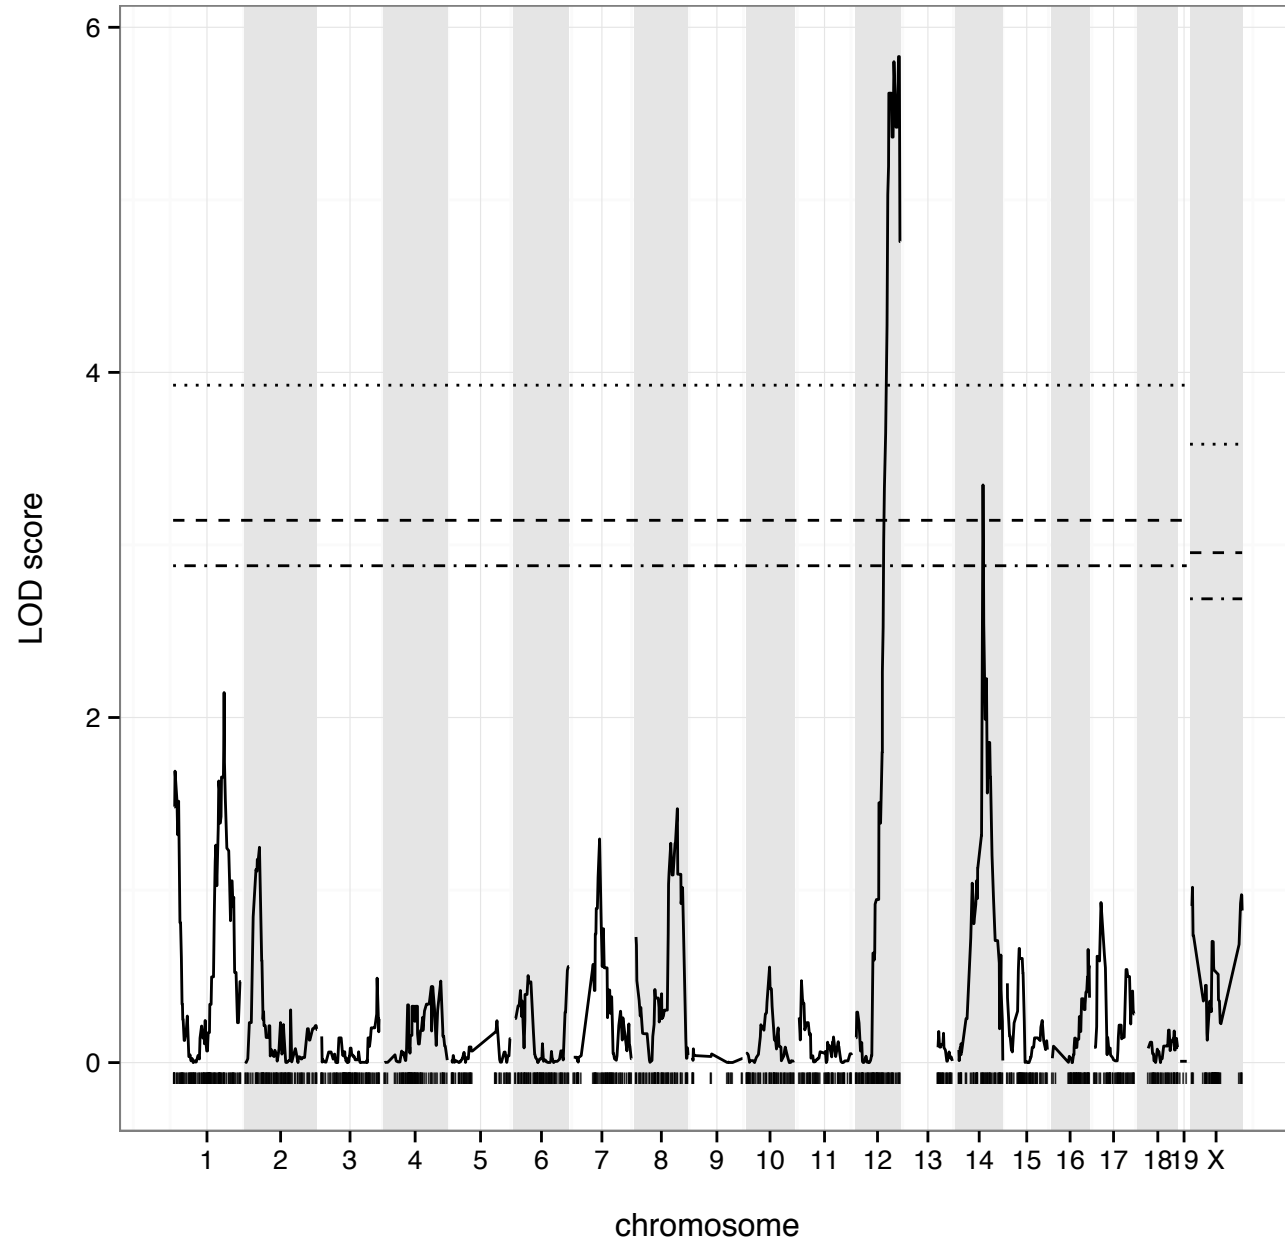

# hyperplasia subscore

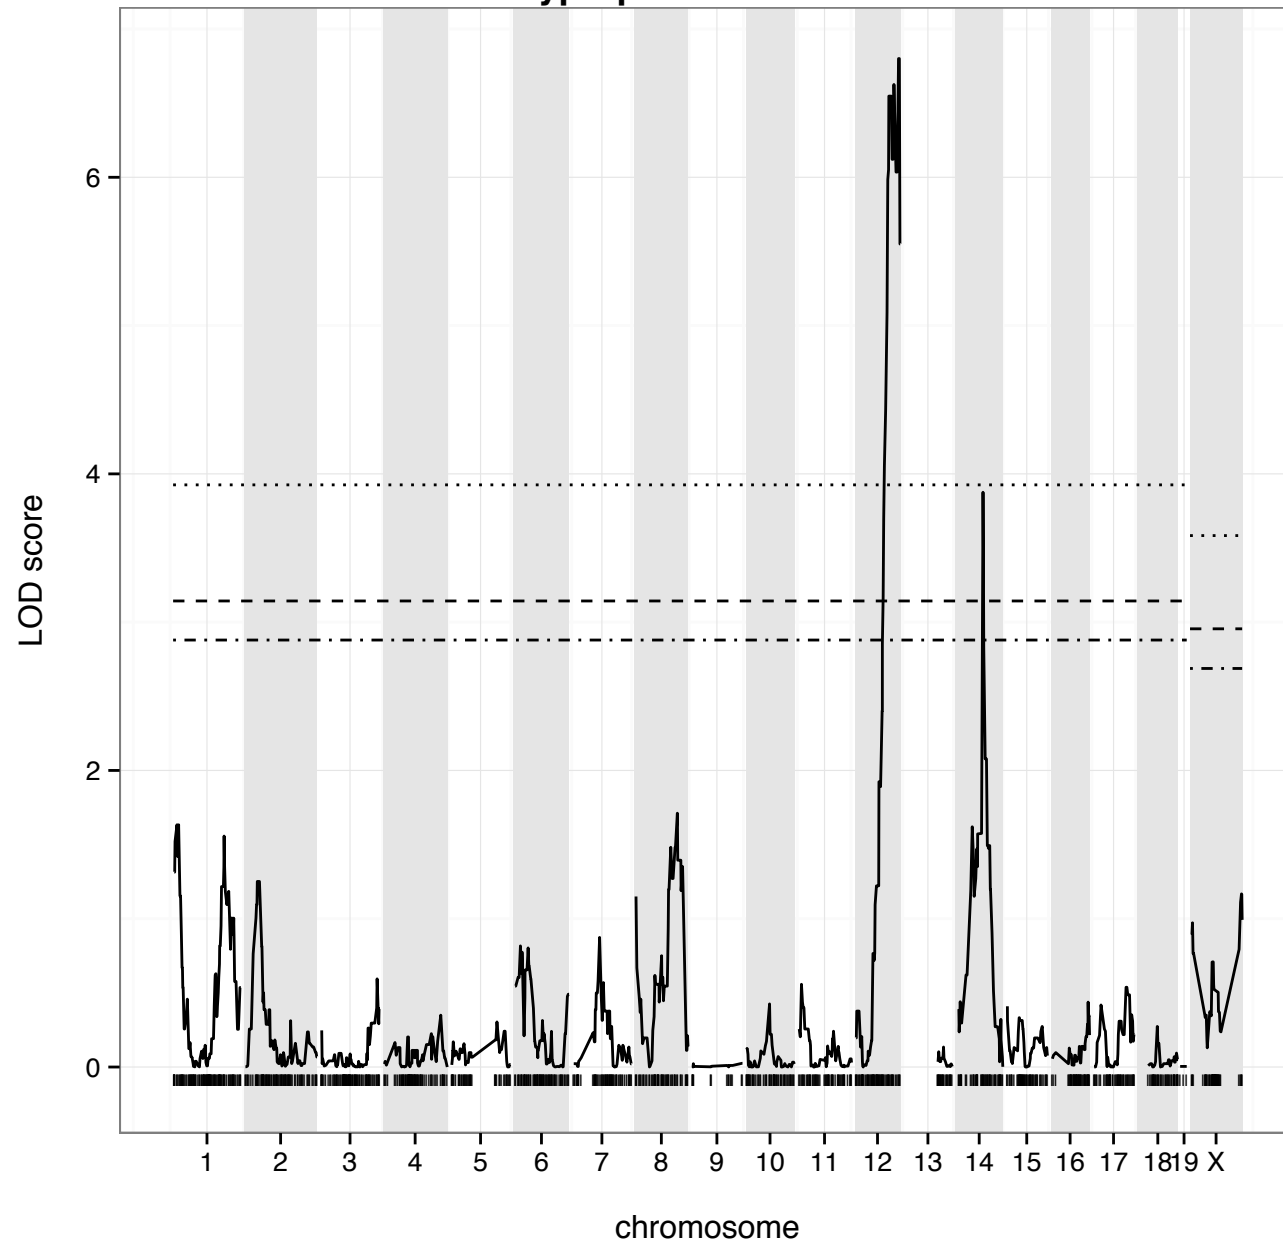

### goblet cell loss subscore

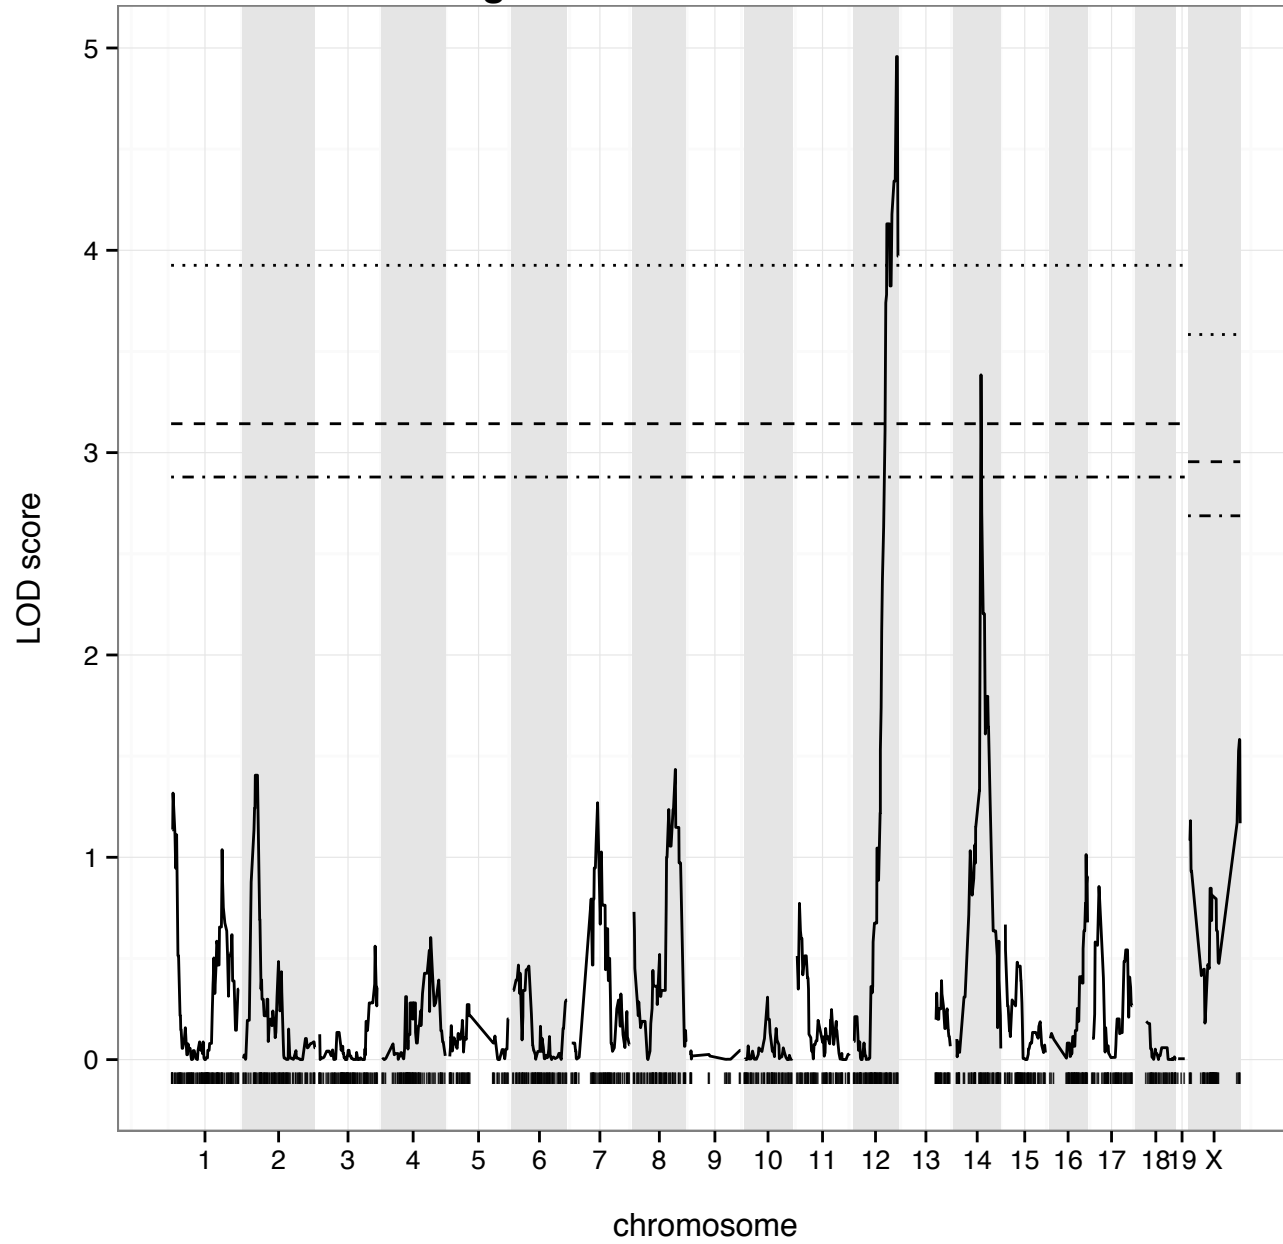

# leukocytic infiltrate subscore

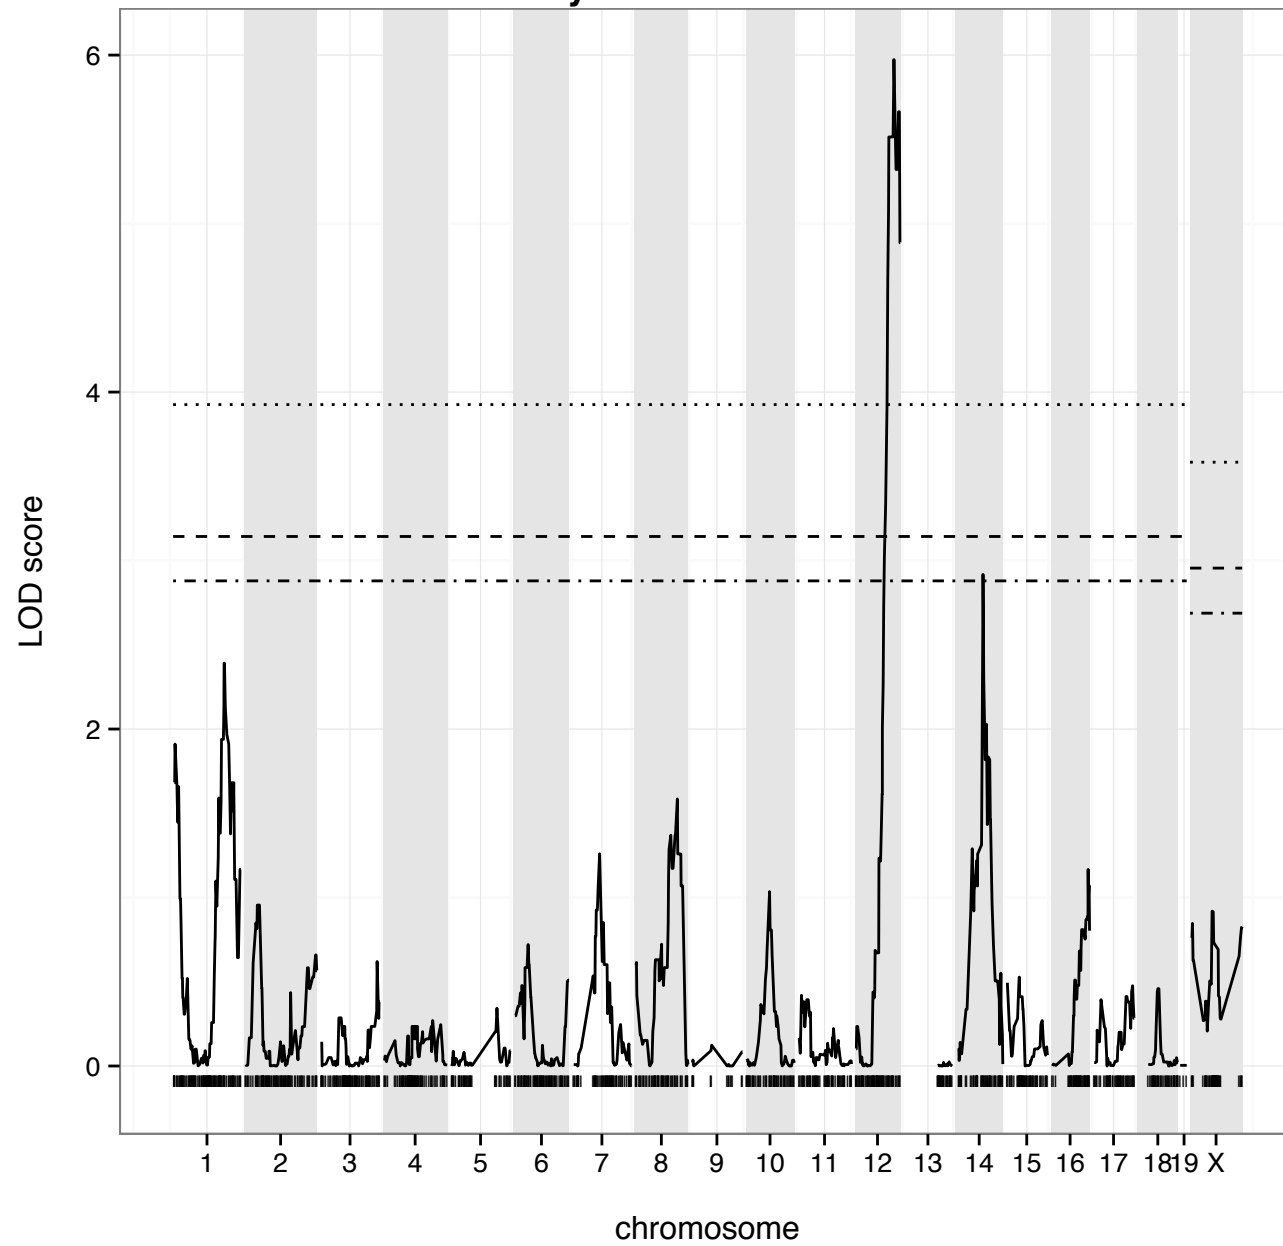

# geographic extent subscore

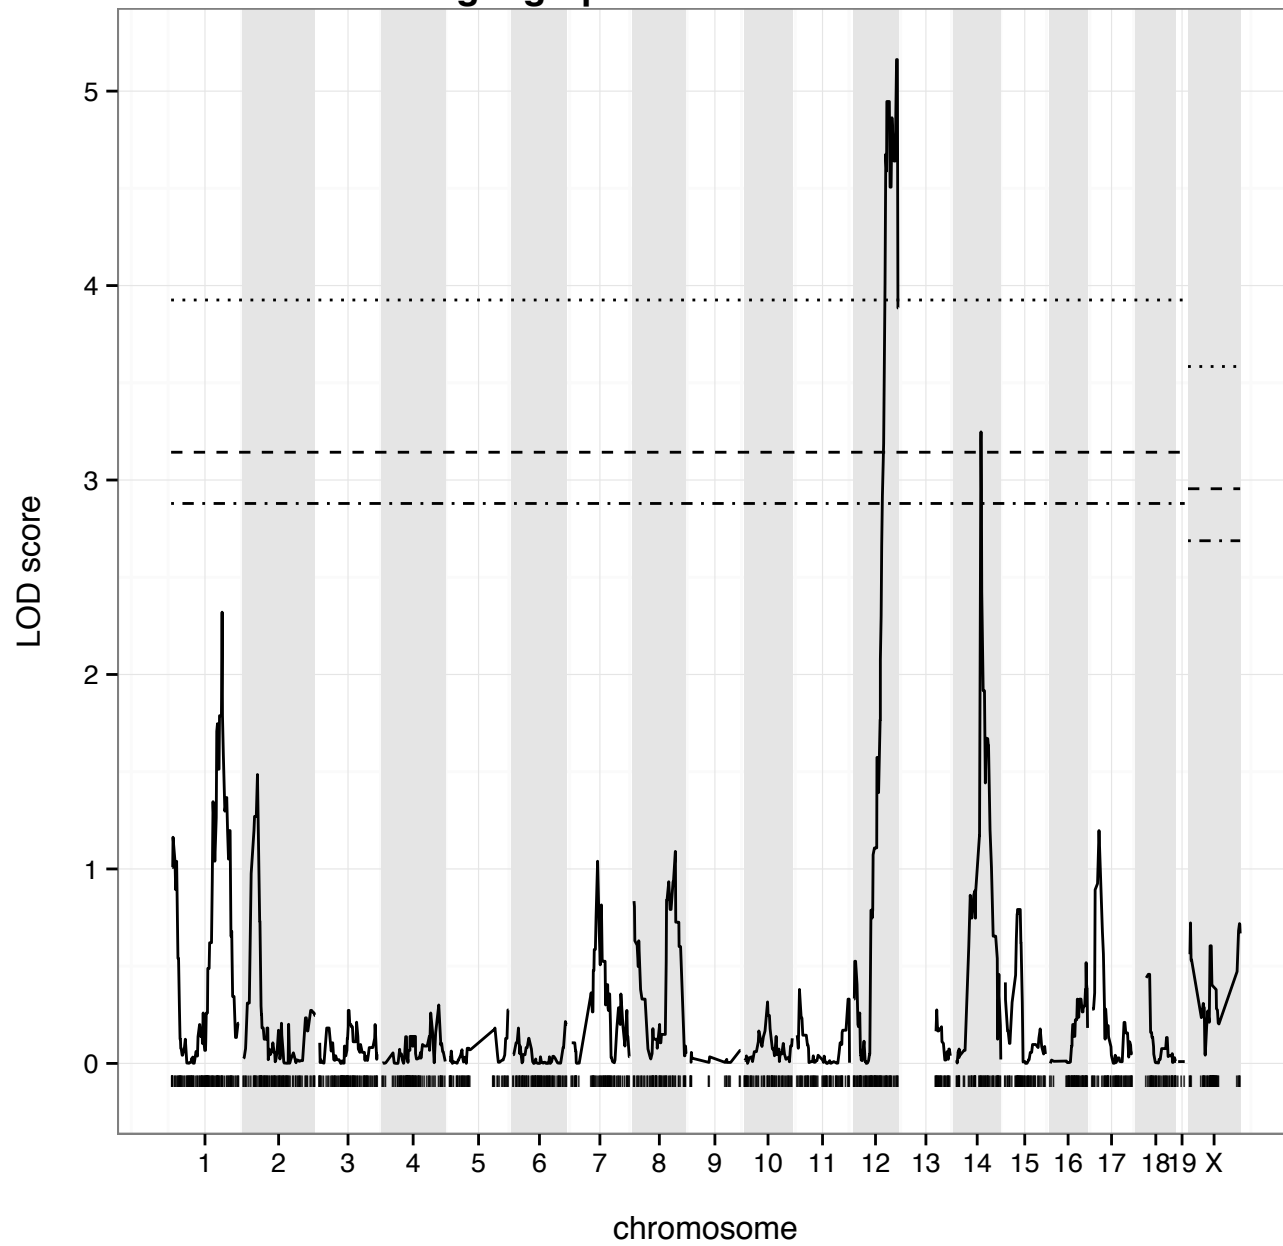

### crypt abscess subscore

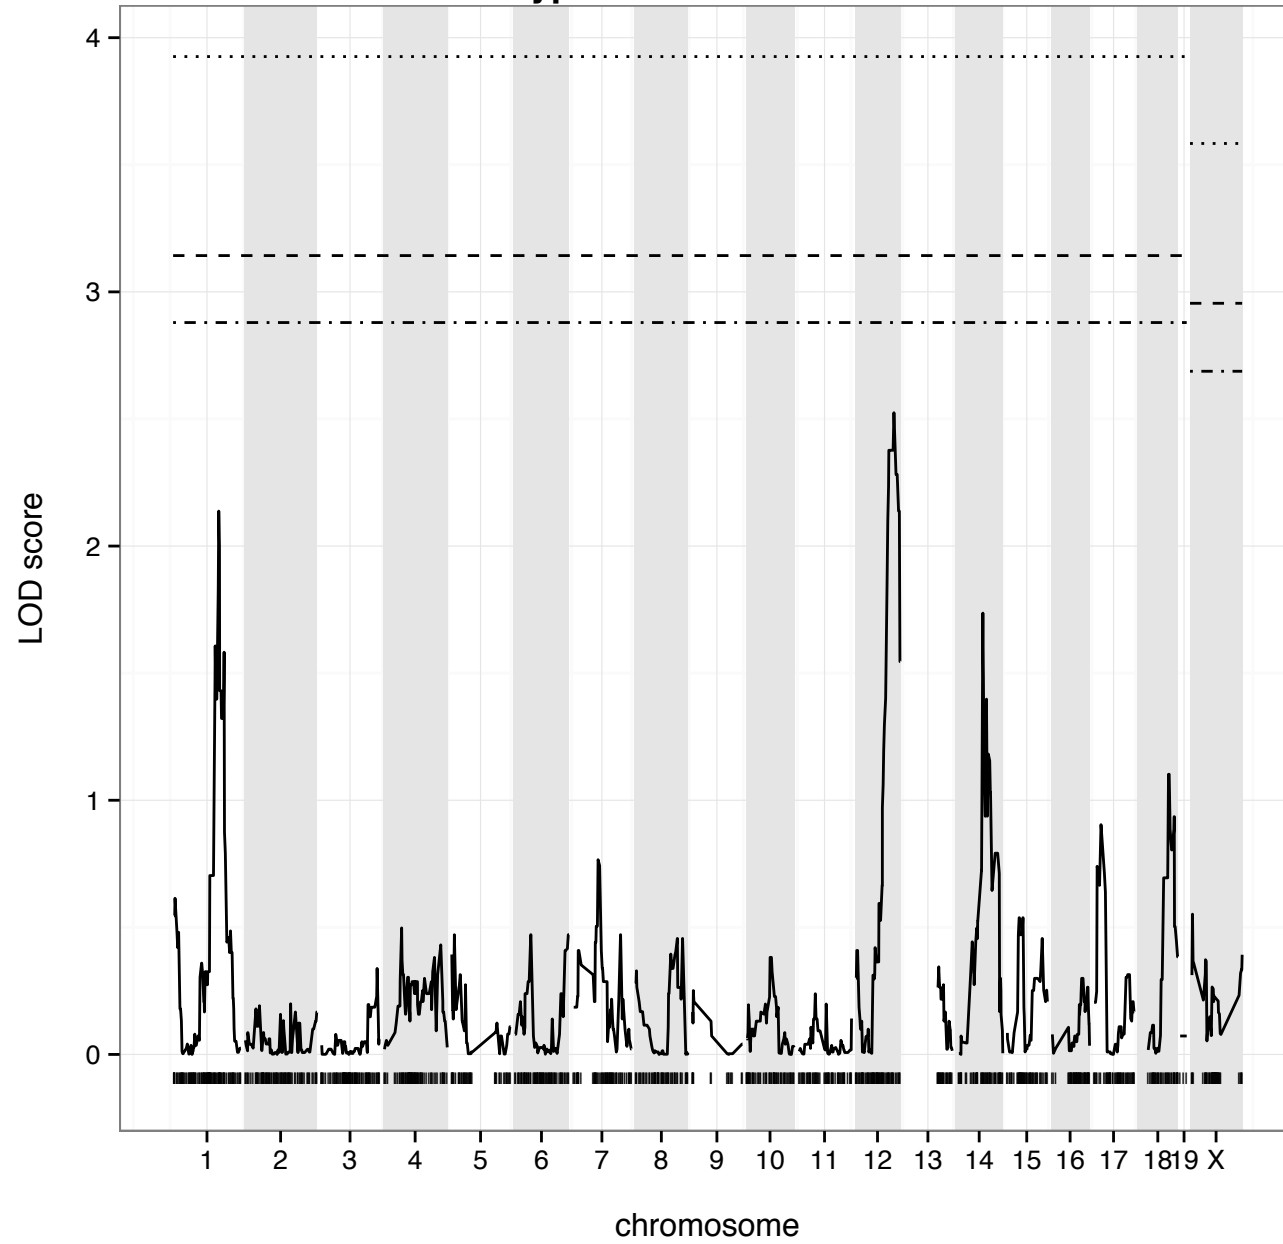

# vasculitis subscore

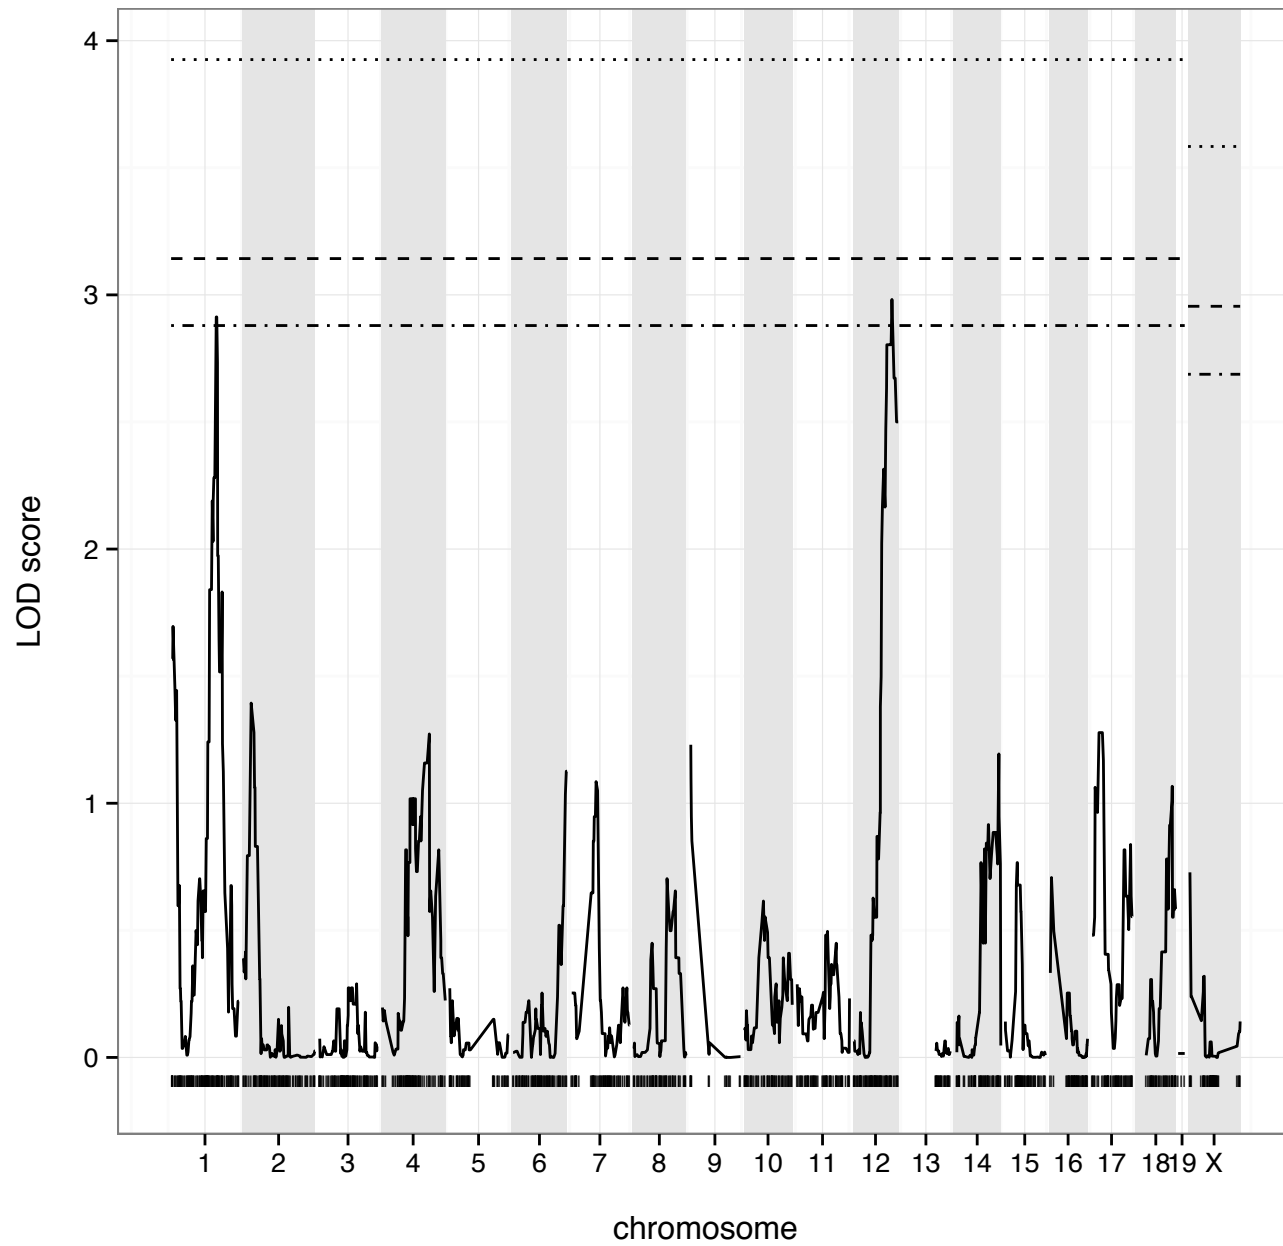

# ulceration subscore

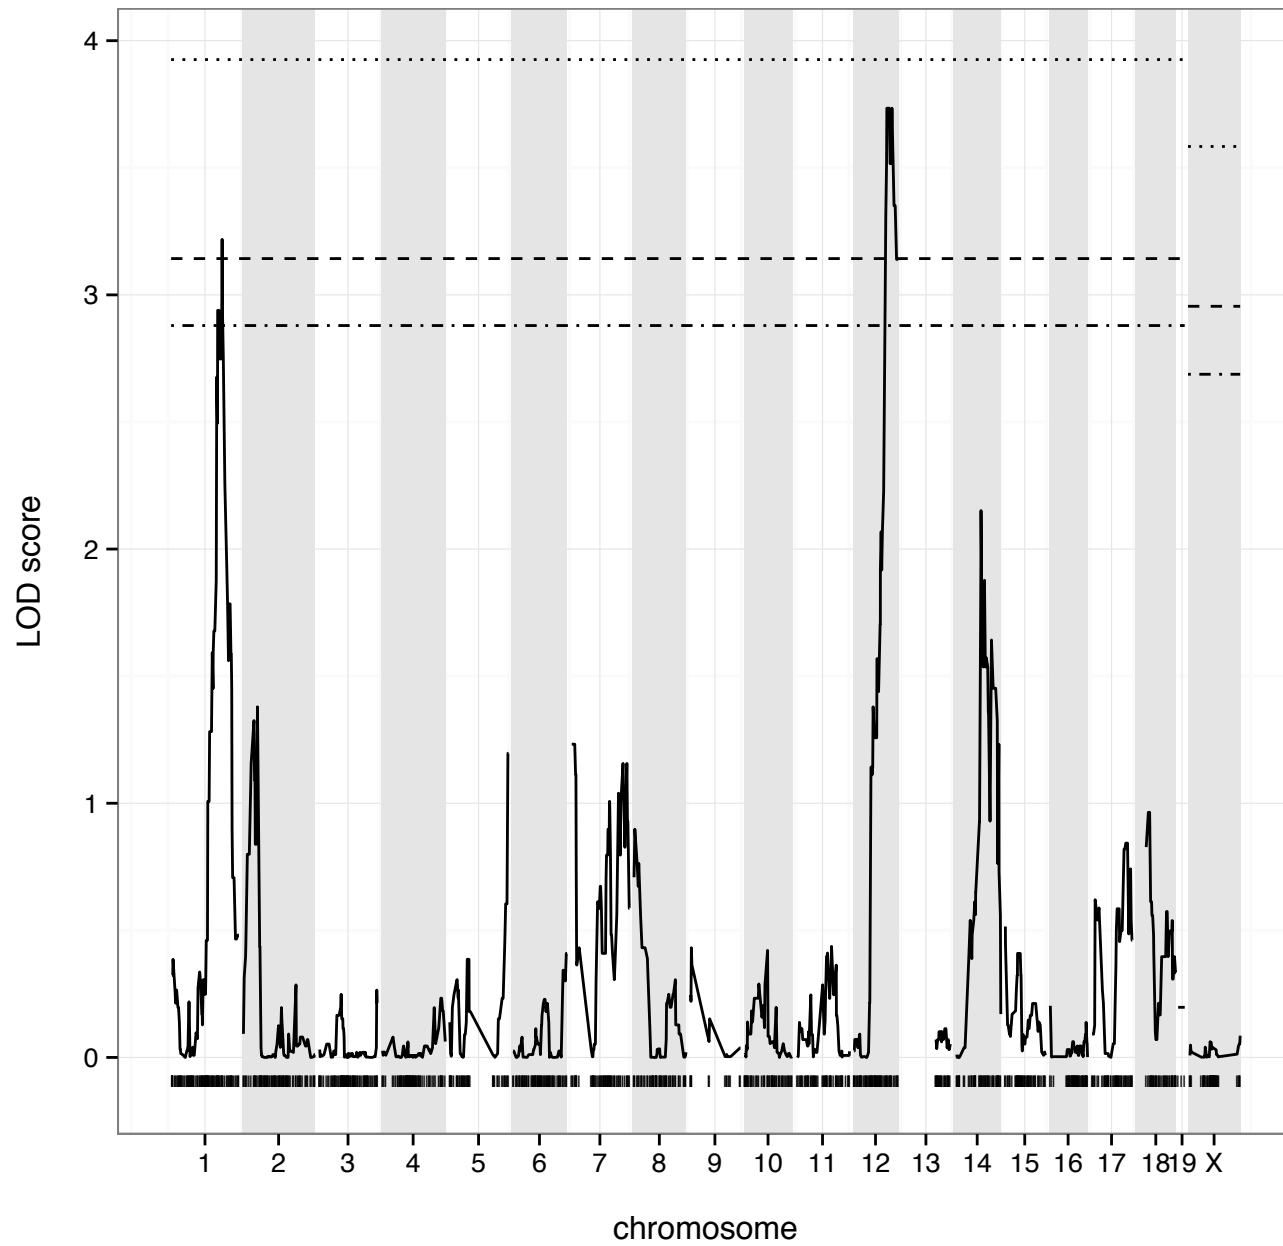



# body weight

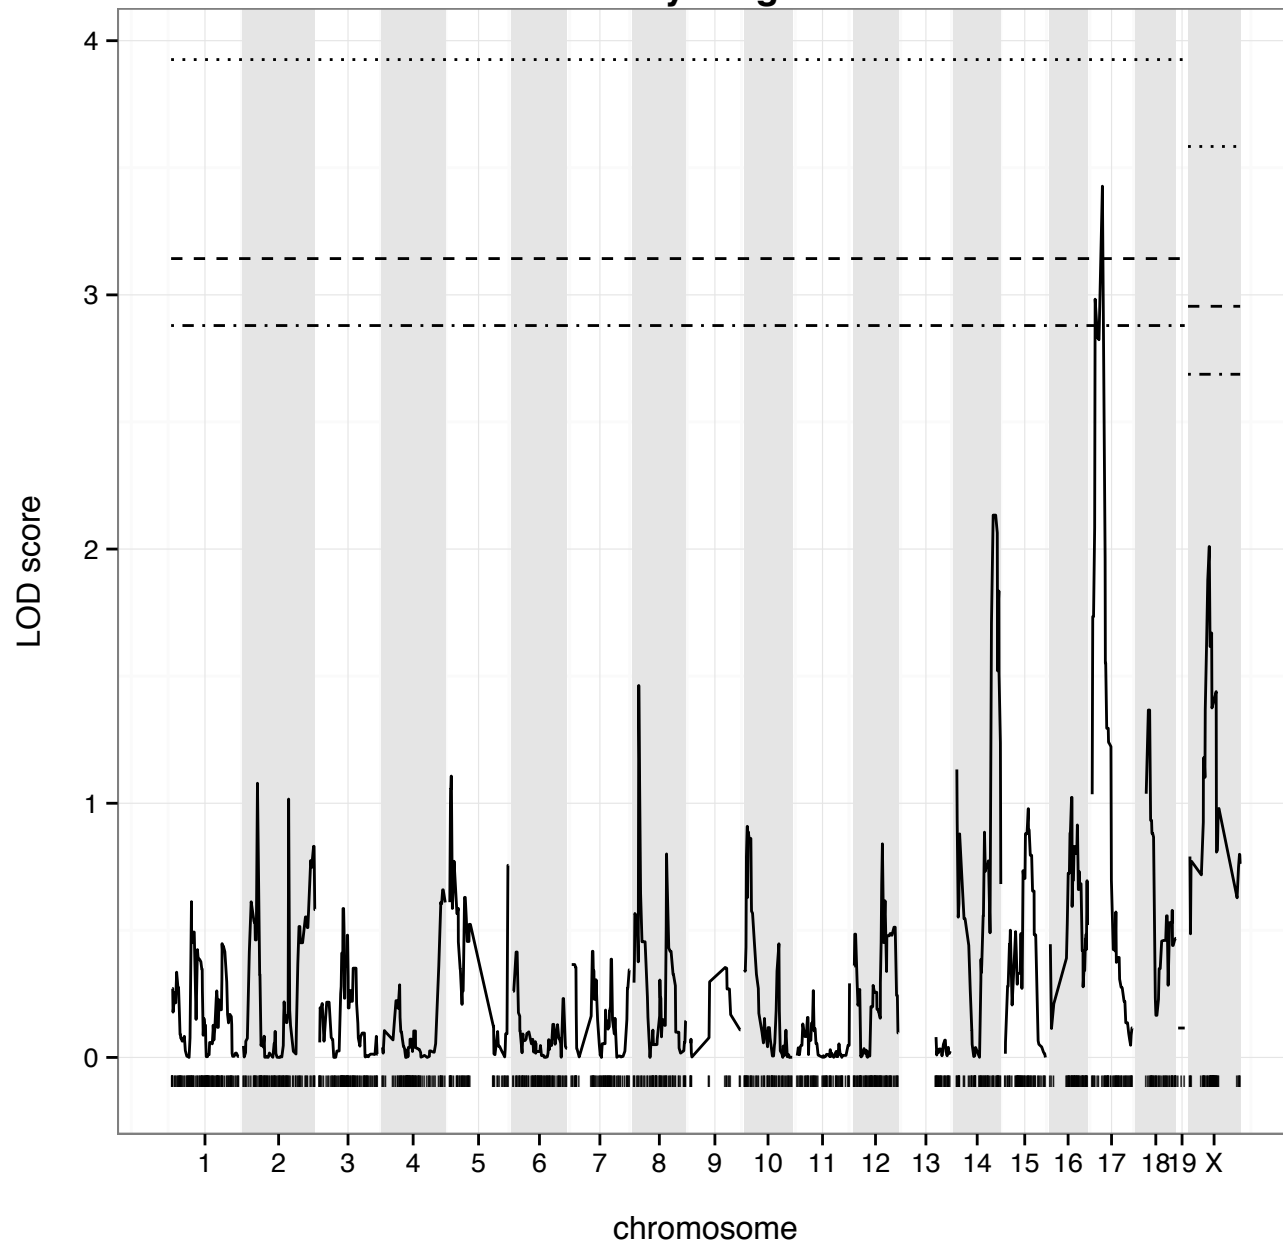

# colon length

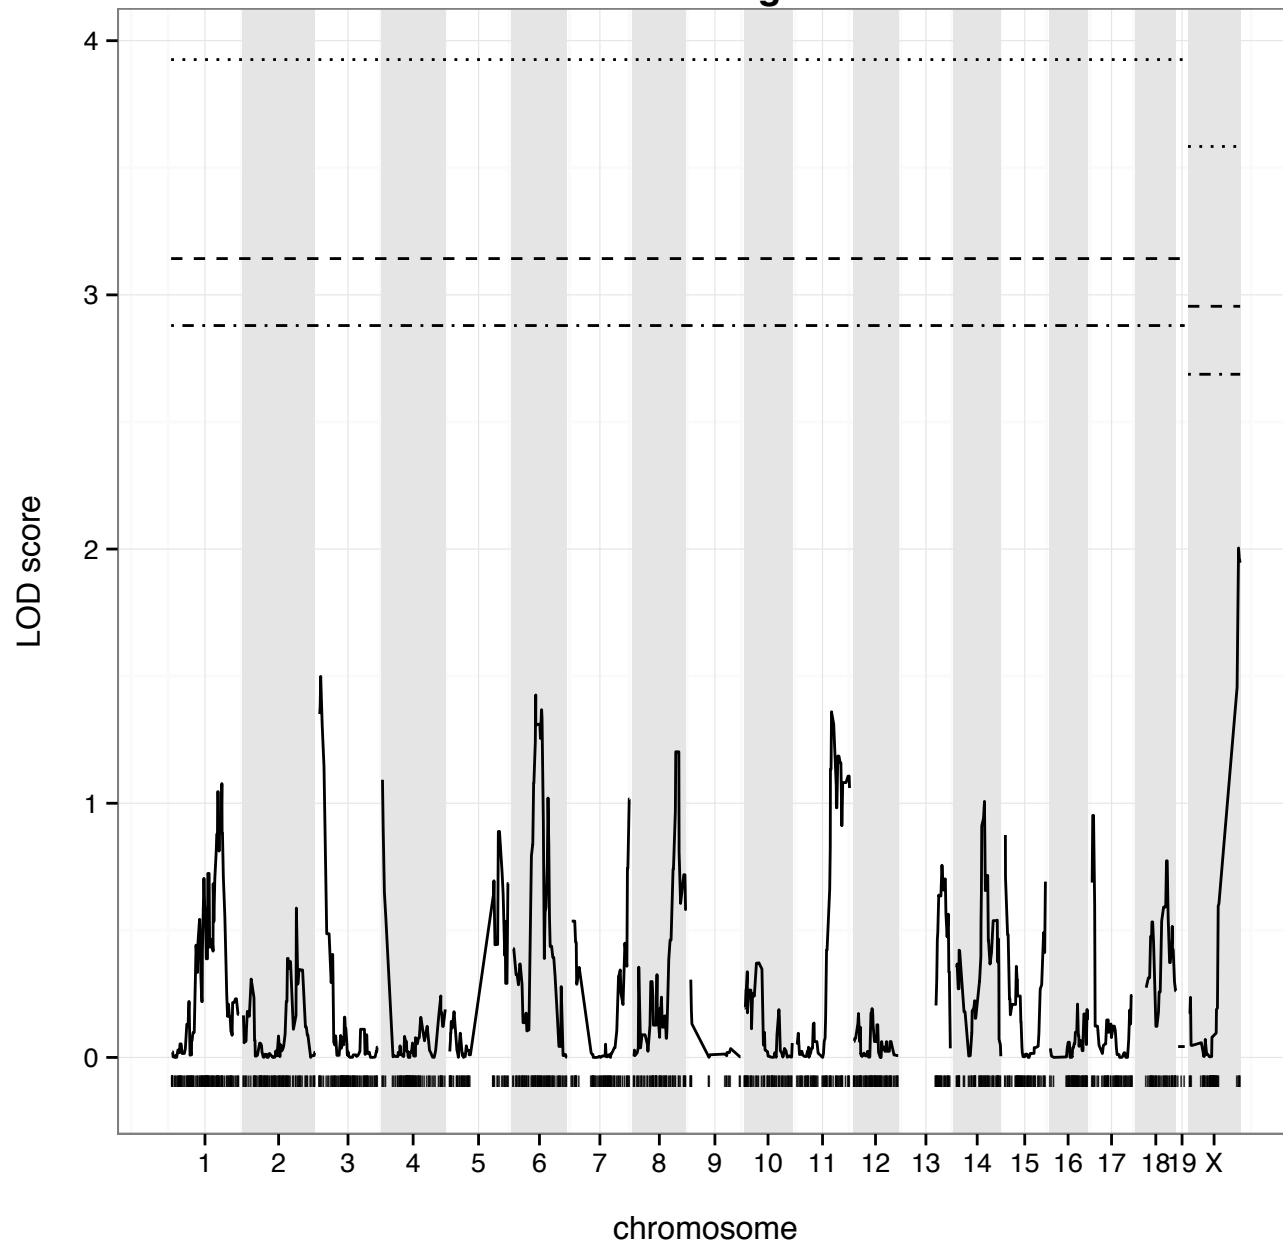

### spleen weight (% body weight)

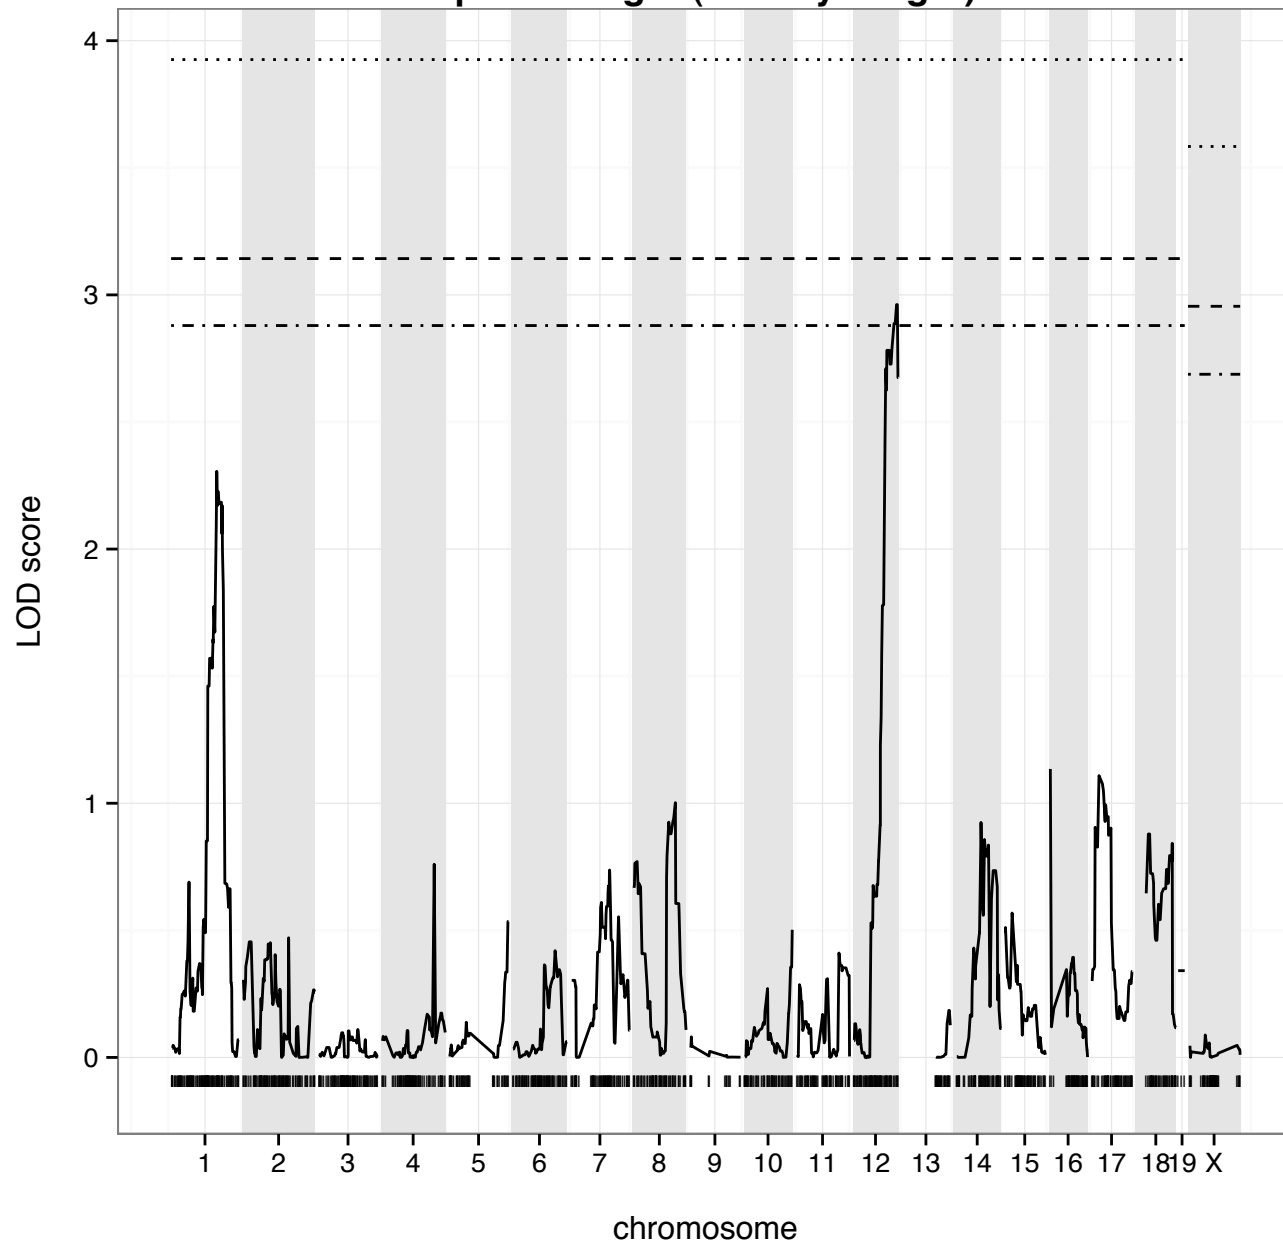

**liver weight (% body weight)**

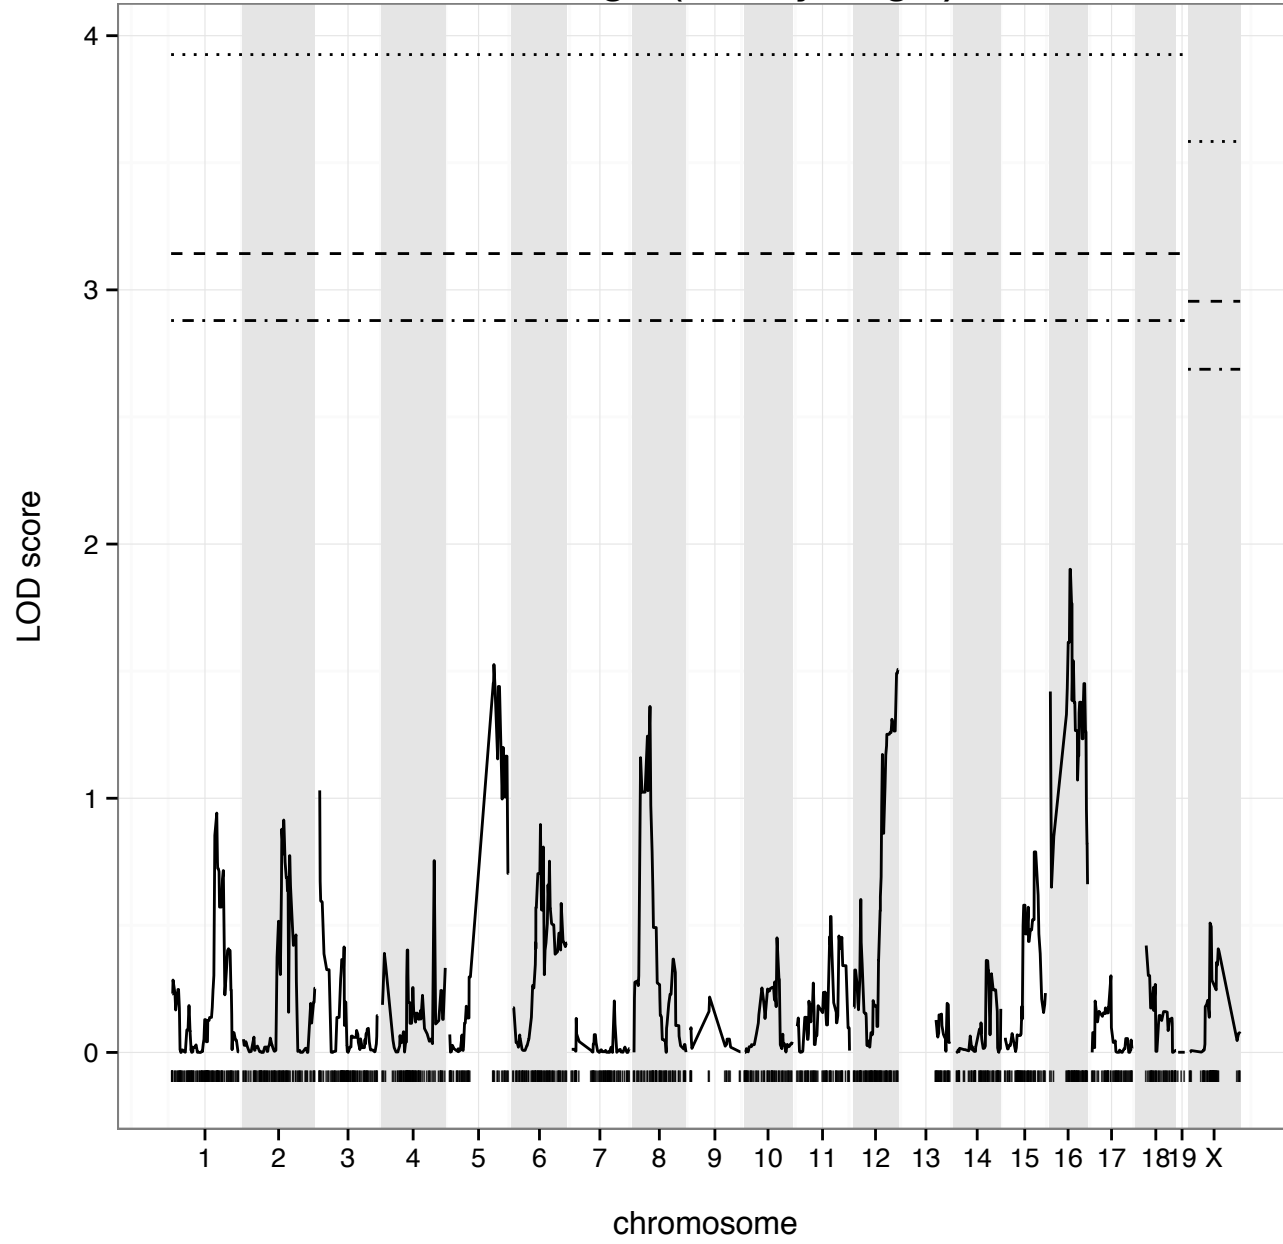

Supplement: 335_2013_9499_MOESM2_ESM.pdf [file 335_2013_9499_MOESM2_ESM.pdf]
